# Supplementary material for: Difference in Methylation and Expression of Brain-Derived Neurotrophic Factor in Alzheimer’s Disease and Mild Cognitive Impairment
Source: MDPI journal article supplement (doi:10.3390/biomedicines11020235), 2023-01-17
Supplement: s1 [file s1]

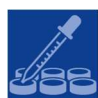

**Table S1.** Amplicon primer sequences and annealing temperatures for *BDNF* and *COMT* genes. In grey shade are Illumina universal sequences that are followed by the sequence-specific primers aligning on the target bisulfite converted DNA sequence.

| Am-<br>plicon | Forward<br>or re-<br>verse<br>primer | Primer Sequence                                                  | Annealing<br>temperature /<br>°C |
|---------------|--------------------------------------|------------------------------------------------------------------|----------------------------------|
| COMT_1        | Forward primer                       | TCGTCGGCAGCGTCAGATGTGTATAAGAGA-<br>CAGGTTTTTAATTTGTATAGGTAAGAT   | 54                               |
|               | Reverse primer                       | GTCTCGTGGGCTCGGAGATGTGTATAAGAGACAG-<br>TACCCTCCCTACCCACAAC       |                                  |
| COMT_2        | Forward primer                       | TCGTCGGCAGCGTCAGATGTGTATAAGAGA-<br>CAGGGTTATTTGTGGTTAGAAGTAGTT   | 54                               |
|               | Reverse primer                       | GTCTCGTGGGCTCGGAGATGTGTATAAGAGA-<br>CAGACTACCCCAAAAACCCAC        |                                  |
| COMT_4        | Forward primer                       | TCGTCGGCAGCGTCAGATGTGTATAAGAGA-<br>CAGNNTGTAGGAGGAGTATAGAGTATTGG | 62                               |
|               | Reverse primer                       | GTCTCGTGGGCTCGGAGATGTGTATAAGAGA-<br>CAGNNTCATAACCCACTCCTTCTACT   |                                  |
| BDNF_1        | Forward primer                       | TCGTCGGCAGCGTCAGATGTGTATAAGAGACAG-<br>TGAGGGTAGGTAAAGGGTAGT      | 55.3                             |
|               | Reverse primer                       | GTCTCGTGGGCTCGGAGATGTGTATAAGAGA-<br>CAACTCTCCCAAAAACCCCTAC       |                                  |
| BDNF_2        | Forward primer                       | TCGTCGGCAGCGTCAGATGTGTATAAGAGACAG-<br>TTATATAGGTTTTGTGGTAATTAG   | 55                               |
|               | Reverse primer                       | GTCTCGTGGGCTCGGAGATGTGTATAAGAGA-<br>CAGAAAAAAAAAAAACTTCTTAAAAAAT |                                  |
| BDNF_3        | Forward primer                       | TCGTCGGCAGCGTCAGATGTGTATAAGAGACAG-<br>TTTTTAGTTATGATGGGGGAGG     | 58                               |
|               | Reverse primer                       | GTCTCGTGGGCTCGGAGATGTGTATAAGAGACAG-<br>CAAATCACACCTAAAACCTCC     |                                  |
| BDNF_4        | Forward primer                       | TCGTCGGCAGCGTCAGATGTGTATAAGAGACAG-<br>GAGTTTATTAGTATTTTGGATAGA   | 55.3                             |
|               | Reverse primer                       | GTCTCGTGGGCTCGGAGATGTGTATAAGAGA-<br>CAGAAAAATCTATTCCAACCTACACC   |                                  |
| BDNF_5        | Forward primer                       | TCGTCGGCAGCGTCAGATGTGTATAAGAGACAG-<br>TTTTTTAAGGGAAGGGGAGTT      | 54                               |
|               | Reverse primer                       | GTCTCGTGGGCTCGGAGATGTGTATAAGAGA-<br>CAGAACTAAAAATATTCTTCTCCACC   |                                  |
| BDNF_6        | Forward primer                       | TCGTCGGCAGCGTCAGATGTGTATAAGAGACAGA-<br>TAGAGTTATTAATTAGTTGGA     | 55                               |
|               | Reverse primer                       | GTCTCGTGGGCTCGGAGATGTGTATAAGAGACAG-<br>TAAATCCCTAAACTCCCTAAAA    |                                  |
| BDNF_7        | Forward primer                       | TCGTCGGCAGCGTCAGATGTGTATAAGAGA-<br>CAGGGTTTTAATGAGATATTTAT       | 58                               |
|               | Reverse primer                       | GTCTCGTGGGCTCGGAGATGTGTATAAGAGA-<br>CAGAAAATCCCCCAATCAACTCTCT    |                                  |
| BDNF_8        | Forward primer                       | TCGTCGGCAGCGTCAGATGTGTATAAGAGA-<br>CAGAAATGTTGTTATTATTTGATTGAATT | 54                               |
|               | Reverse primer                       | GTCTCGTGGGCTCGGAGATGTGTATAAGAGA-<br>CAGAACACCCAAATTCTCTAAAAA     |                                  |
| BDNF_9        | Forward primer                       | TCGTCGGCAGCGTCAGATGTGTATAAGAGA-<br>CAGNNTTTTTTAGAGAATTTGGGTGT    | 56.7                             |
|               | Reverse primer                       | GTCTCGTGGGCTCGGAGATGTGTATAAGAGA-<br>CAGNNAACCTATCCTACCTCCT       |                                  |

**Table S2.** Correlation of *BDNF* expression with demographic and clinical characteristics of subjects divided by diagnosis into subjects with MCI and subjects with AD.

| Characteristics            | MCI                  |          | AD                   |          |
|----------------------------|----------------------|----------|----------------------|----------|
|                            | <i>r<sub>s</sub></i> | <i>p</i> | <i>r<sub>s</sub></i> | <i>p</i> |
| Age (years)                | -0.014               | 0.897    | 0.089                | 0.450    |
| BMI (kg/m <sup>2</sup> )   | 0.028                | 0.798    | -0.071               | 0.548    |
| Waist circumference (cm)   | -0.009               | 0.935    | -0.134               | 0.256    |
| Total cholesterol (mmol/l) | 0.079                | 0.470    | -0.063               | 0.592    |
| HDL-cholesterol (mmol/l)   | 0.255                | 0.018    | -0.168               | 0.152    |
| LDL-cholesterol (mmol/l)   | -0.023               | 0.834    | -0.056               | 0.634    |
| Triglycerides              | -0.010               | 0.930    | 0.099                | 0.401    |
| Blood glucose (mmol/l)     | 0.036                | 0.742    | 0.121                | 0.306    |

AD, Alzheimer's Disease; HDL, High-Density Lipoproteins; BMI, Body Mass Index; LDL, Low-Density Lipoproteins; MCI, Mild Cognitive Impairment; *r<sub>s</sub>*, Spearman's Rank Correlation Coefficient

**Table S3.** Correlation of *COMT* expression with demographic and clinical characteristics of subjects divided by diagnosis into subjects with MCI and subjects with AD.

| Characteristics            | MCI                  |          | AD                   |          |
|----------------------------|----------------------|----------|----------------------|----------|
|                            | <i>r<sub>s</sub></i> | <i>p</i> | <i>r<sub>s</sub></i> | <i>p</i> |
| Age (years)                | 0.073                | 0.507    | -0.151               | 0.057    |
| BMI (kg/m <sup>2</sup> )   | -0.012               | 0.915    | 0.184                | 0.117    |
| Waist circumference (cm)   | -0.082               | 0.451    | 0.176                | 0.134    |
| Total cholesterol (mmol/l) | -0.096               | 0.379    | 0.036                | 0.760    |
| HDL-cholesterol (mmol/l)   | -0.031               | 0.775    | -0.118               | 0.317    |
| LDL-cholesterol (mmol/l)   | -0.013               | 0.905    | 0.062                | 0.597    |
| Triglycerides              | -0.205               | 0.058    | 0.102                | 0.386    |
| Blood glucose (mmol/l)     | -0.138               | 0.204    | -0.058               | 0.626    |

AD, Alzheimer's Disease; HDL, High-Density Lipoproteins; BMI, Body Mass Index; LDL, Low-Density Lipoproteins; MCI, Mild Cognitive Impairment; *r<sub>s</sub>*, Spearman's Rank Correlation Coefficient
